# Supplementary material
Source: ML conference proceedings conference paper supplement (https://openreview.net/forum?id=MCnbUQsSmo)
Supplement: supplementary_material [file attachment]

# CLQ: CROSS-LAYER GUIDED ORTHOGONAL-BASED QUANTIZATION FOR DIFFUSION TRANSFORMERS

**Anonymous authors**

Paper under double-blind review

## A PIPELINE

The detailed pipeline of the proposed CLQ is shown in Alg. 1

---

### Algorithm 1: CLQ Process Pipeline

---

**Data:** Dataset  $\mathcal{D} = \{X_i\}_{i=1}^N$ , DiT model  $M$

**Result:** Rotation Matrices  $\mathcal{G}$ , Quantization Parameters  $\mathcal{Q}$ .

$\mathcal{G} \leftarrow []$ ;

$\mathcal{Q} \leftarrow []$ ;

**foreach** block  $B$  in  $M$  **do**

    // CBC

    Perform forward propagation within  $B$  with  $\mathcal{D}$ ;

    Record the activation within  $B$ ;

**foreach** layer  $L_O$  in  $B$  **do**

        // OBS

        Calculate the outlier score for layer  $L_O$ ;

        Swap channels for  $L_O$  such that the top 50% outlier channels are on the top left 50% ;

        Generate the channel swapping matrix  $\mathbf{S}$  with above step;

        Generate block Hadamard matrix  $\mathbf{H}$ ;

        Compute rotation matrix  $\mathbf{G} = \mathbf{S}\mathbf{H}$ ;

$\mathcal{G}.\text{append}(\mathbf{G})$ ;

        // CLPS

        Apply perturbation to  $\mathbf{W}$  such that it changes to  $\hat{\mathbf{W}}$ ;

        Perform forward propagation with  $\mathcal{D}$ ;

        Record the activations within the three blocks following  $B$ ;

        Calculate the shift from the original activation;

        Find the target layer  $L_T$  with the biggest shift;

        Search the optimal quantization bound  $l^*, r^* = \arg \min_{l \in \mathcal{S}_l, r \in \mathcal{S}_r} \|Y - \hat{Y}_{l,r}\|_F^2$ ;

$\mathcal{Q}.\text{append}((l^*, r^*))$

**end**

**end**

**return**  $\mathcal{G}, \mathcal{Q}$ ;

---

## B EFFICIENCY OF HADAMARD-BASED MATRIX MULTIPLICATION

The computational advantage of employing Hadamard matrices arises from their close connection to the Fast Walsh–Hadamard Transform (FWHT) Hamood & Boussakta (2011). Unlike general dense matrices, whose multiplication with an  $n \times n$  matrix requires approximately  $2n^3 - n^2$  floating-point operations (flops), the Hadamard matrix consists only of entries  $\pm 1$  and admits a recursive structure that enables efficient evaluation. Specifically, multiplying an  $n \times n$  Hadamard matrix with a vector can be carried out in  $n \log_2 n$  flops using FWHT, since the operation decomposes into  $\log_2 n$  stages of pairwise additions and subtractions, entirely avoiding multiplications. Consequently, when multiplying a Hadamard matrix with an arbitrary  $n \times n$  matrix on the appropriate side (e.g.,  $HA$ ), the total cost reduces to  $n^2 \log_2 n$  flops, compared to cubic complexity for standard matrix–matrix multiplication. Moreover, by exploiting the identity  $(AH)^T = HA^T$  and the symmetry of Hadamard

054  
055  
056  
057  
058  
059  
060  
061  
062  
063  
064  
065  
066  
067  
068  
069  
070  
071  
072  
073  
074  
075  
076  
077  
078  
079  
080  
081  
082  
083  
084  
085  
086  
087  
088  
089  
090  
091  
092  
093  
094  
095  
096  
097  
098  
099  
100  
101  
102  
103  
104  
105  
106  
107

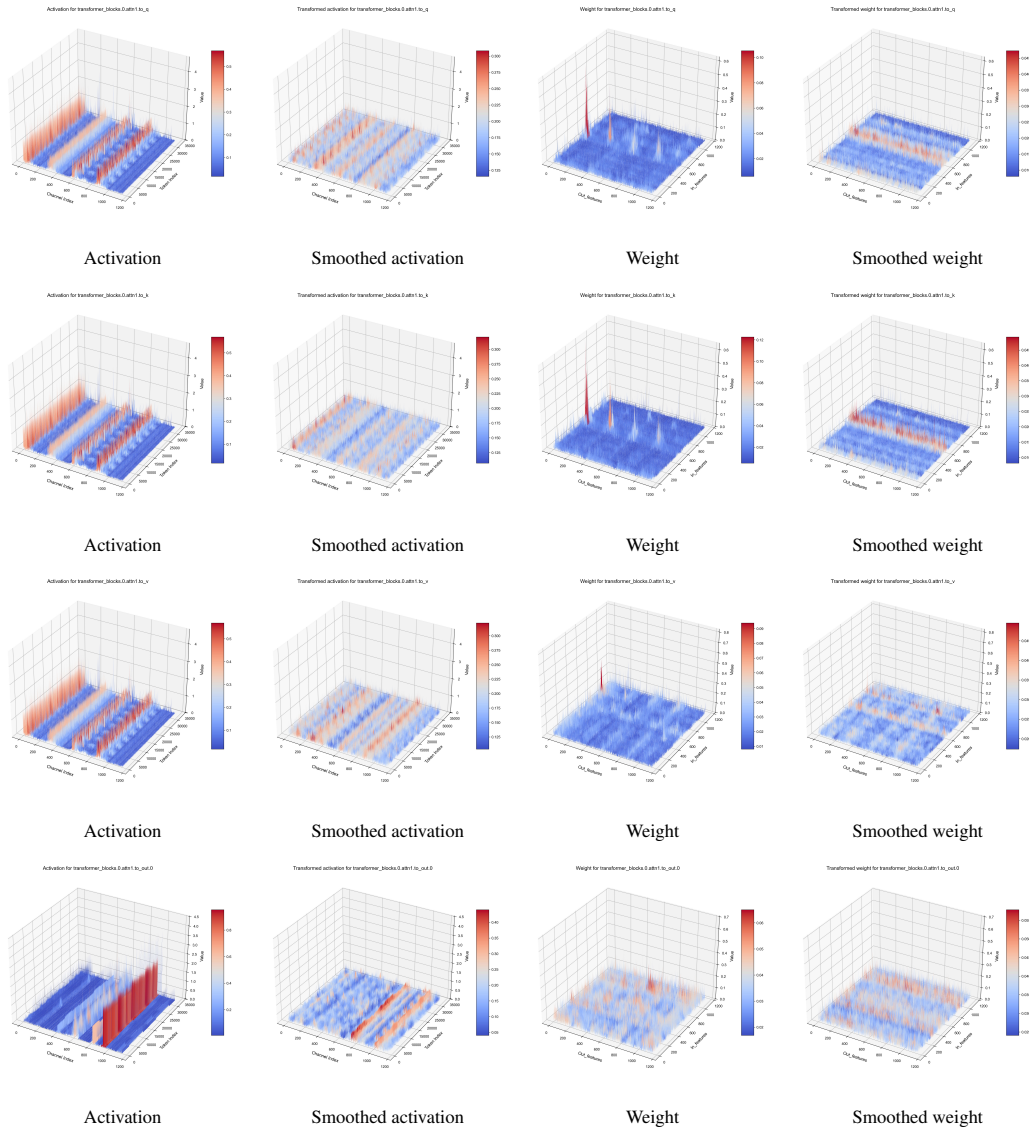

Figure 1: Visualization of the activation and weight before and after CLQ.

matrices, the same acceleration can be leveraged for  $AH$  as well, yielding an overall reduction from  $O(n^3)$  to  $O(n^2 \log n)$ .

### C SMOOTHED WEIGHT AND ACTIVATION

We visualize the weight and activations in Fig. 1. To demonstrate the outliers, the displayed values are the absolute value of the original value. All the activations are smoothed after CLQ, while most of the weights are smoother after CLQ. This visualization demonstrates the outstanding performance of the proposed OBS.

### D VBENCH

We provide results on other dimensions of VBench in Tab. 1.

Table 1: Comparison with SOTA PTQ methods on VBench. The best and the second best results are marked with **bold** and underline, respectively. “-” means the model collapses.

| Methods     | Bits (W/A) | Subject Consist. | Temporal Flickering | Object Class | Multiple Objects | Human Action | Color | Spatial Relationship | Temporal Style | Appearance Style |
|-------------|------------|------------------|---------------------|--------------|------------------|--------------|-------|----------------------|----------------|------------------|
| FP          | 16/16      | 93.71            | 99.47               | 76.98        | 47.56            | 91.00        | 75.74 | 44.78                | 25.51          | 24.15            |
| Q-DiT       | 8/8        | 86.94            | 99.41               | 78.52        | 42.85            | 88.00        | 67.56 | 54.10                | 23.63          | 24.13            |
| SmoothQuant | 8/8        | 93.20            | 99.42               | 81.38        | 44.58            | 89.00        | 69.04 | 54.73                | 25.62          | 24.04            |
| Quarot      | 8/8        | 93.32            | 99.41               | 80.17        | 41.92            | 91.00        | 67.90 | 52.10                | 25.56          | 24.07            |
| ViDiT-Q     | 8/8        | 93.59            | 99.20               | 76.66        | 47.56            | 89.00        | 71.19 | 48.48                | 25.57          | 24.05            |
| CLQ (Ours)  | 8/8        | 93.62            | 99.49               | 81.52        | 52.88            | 91.00        | 71.89 | 54.96                | 25.63          | 24.15            |
| Q-DiT       | 4/8        | 91.51            | 97.42               | 65.14        | 38.47            | 79.00        | 62.31 | 48.28                | 22.31          | 17.38            |
| SmoothQuant | 4/8        | 92.74            | 99.40               | 74.28        | 53.12            | 86.00        | 68.25 | 50.71                | 24.62          | 24.13            |
| Quarot      | 4/8        | 92.91            | 99.38               | 74.92        | 46.04            | 86.00        | 73.37 | 50.58                | 25.33          | 23.50            |
| ViDiT-Q     | 4/8        | 92.87            | 99.28               | 78.00        | 45.42            | 88.00        | 74.23 | 52.08                | 25.60          | 24.09            |
| CLQ (Ours)  | 4/8        | 93.61            | 99.56               | 82.04        | 56.33            | 91.00        | 72.35 | 53.61                | 25.24          | 24.12            |
| Q-DiT       | 4/4        | -                | -                   | -            | -                | -            | -     | -                    | -              | -                |
| SmoothQuant | 4/4        | 79.82            | 86.71               | 2.13         | 0.00             | 1.00         | 0.00  | 0.00                 | 2.94           | 20.67            |
| Quarot      | 4/4        | 87.27            | 94.58               | 5.30         | 0.00             | 1.00         | 0.00  | 0.03                 | 4.36           | 20.91            |
| ViDiT-Q     | 4/4        | 88.19            | 94.72               | 5.93         | 0.00             | 0.00         | 0.00  | 0.11                 | 4.08           | 20.84            |
| CLQ (Ours)  | 4/4        | 90.29            | 98.56               | 72.47        | 41.46            | 79.00        | 65.97 | 49.14                | 25.85          | 24.19            |

## E VISUAL COMPARISON

In this section, we provide more visual comparison in Fig. 2, 3, 4, and 5 with SOTA method under various bit settings.

162  
163  
164  
165  
166  
167  
168  
169  
170  
171  
172  
173  
174  
175  
176  
177  
178  
179  
180  
181  
182  
183  
184  
185  
186  
187  
188  
189  
190  
191  
192  
193  
194  
195  
196  
197  
198  
199  
200  
201  
202  
203  
204  
205  
206  
207  
208  
209  
210  
211  
212  
213  
214  
215

## REFERENCES

Monir T Hamood and Said Boussakta. Fast walsh–hadamard–fourier transform algorithm. *IEEE TSP*, 59(11):5627–5631, 2011.

216  
217  
218  
219  
220  
221  
222  
223  
224  
225  
226  
227  
228  
229  
230  
231  
232  
233  
234  
235  
236  
237  
238  
239  
240  
241  
242  
243  
244  
245  
246  
247  
248  
249  
250  
251  
252  
253  
254  
255  
256  
257  
258  
259  
260  
261  
262  
263  
264  
265  
266  
267  
268  
269

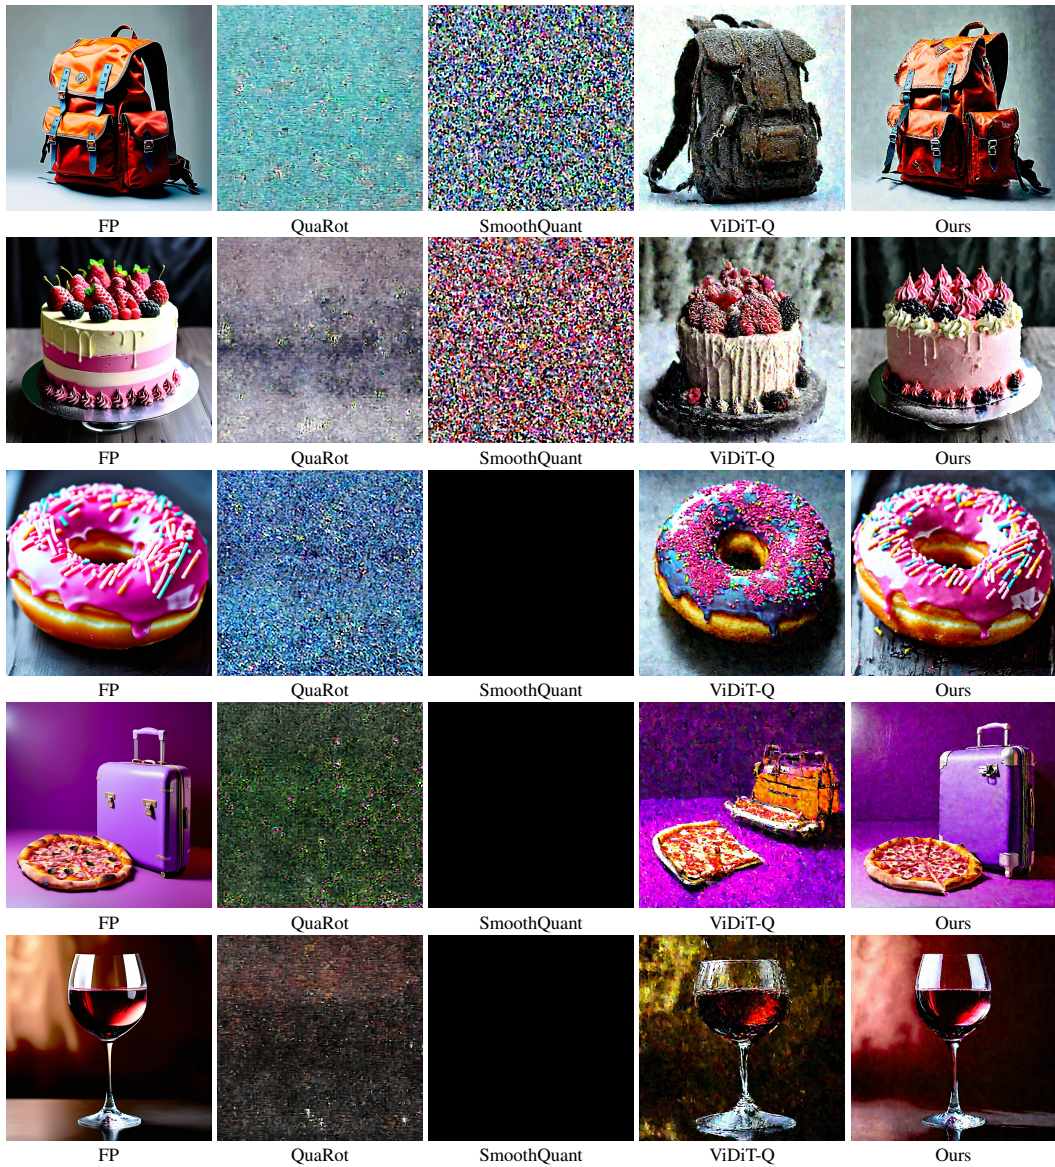

Figure 2: Visual comparison for image generation with **W4A4**.

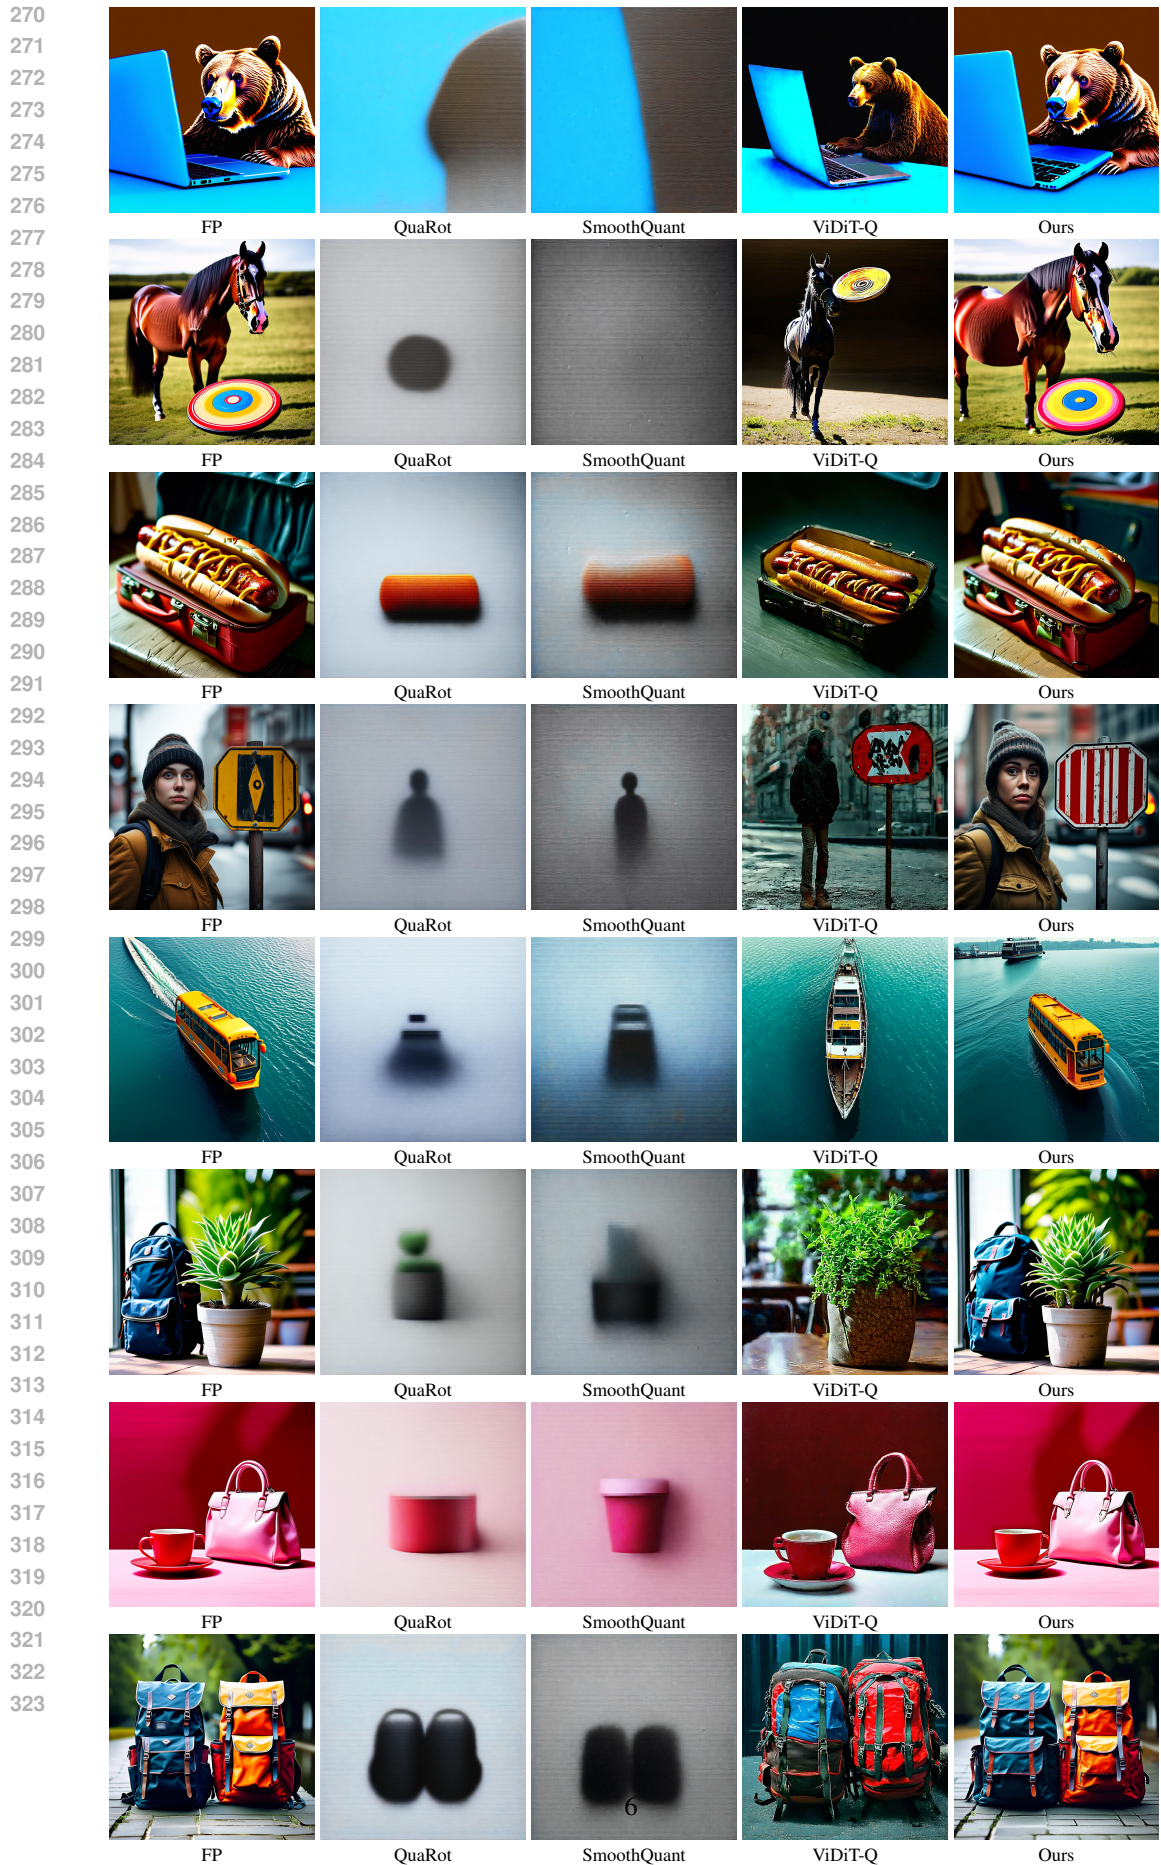

Figure 3: Visual comparison for image generation with W4A8.

324  
325  
326  
327  
328  
329  
330  
331  
332  
333  
334  
335  
336  
337  
338  
339  
340  
341  
342  
343  
344  
345  
346  
347  
348  
349  
350  
351  
352  
353  
354  
355  
356  
357  
358  
359  
360  
361  
362  
363  
364  
365  
366  
367  
368  
369  
370  
371  
372  
373  
374  
375  
376  
377

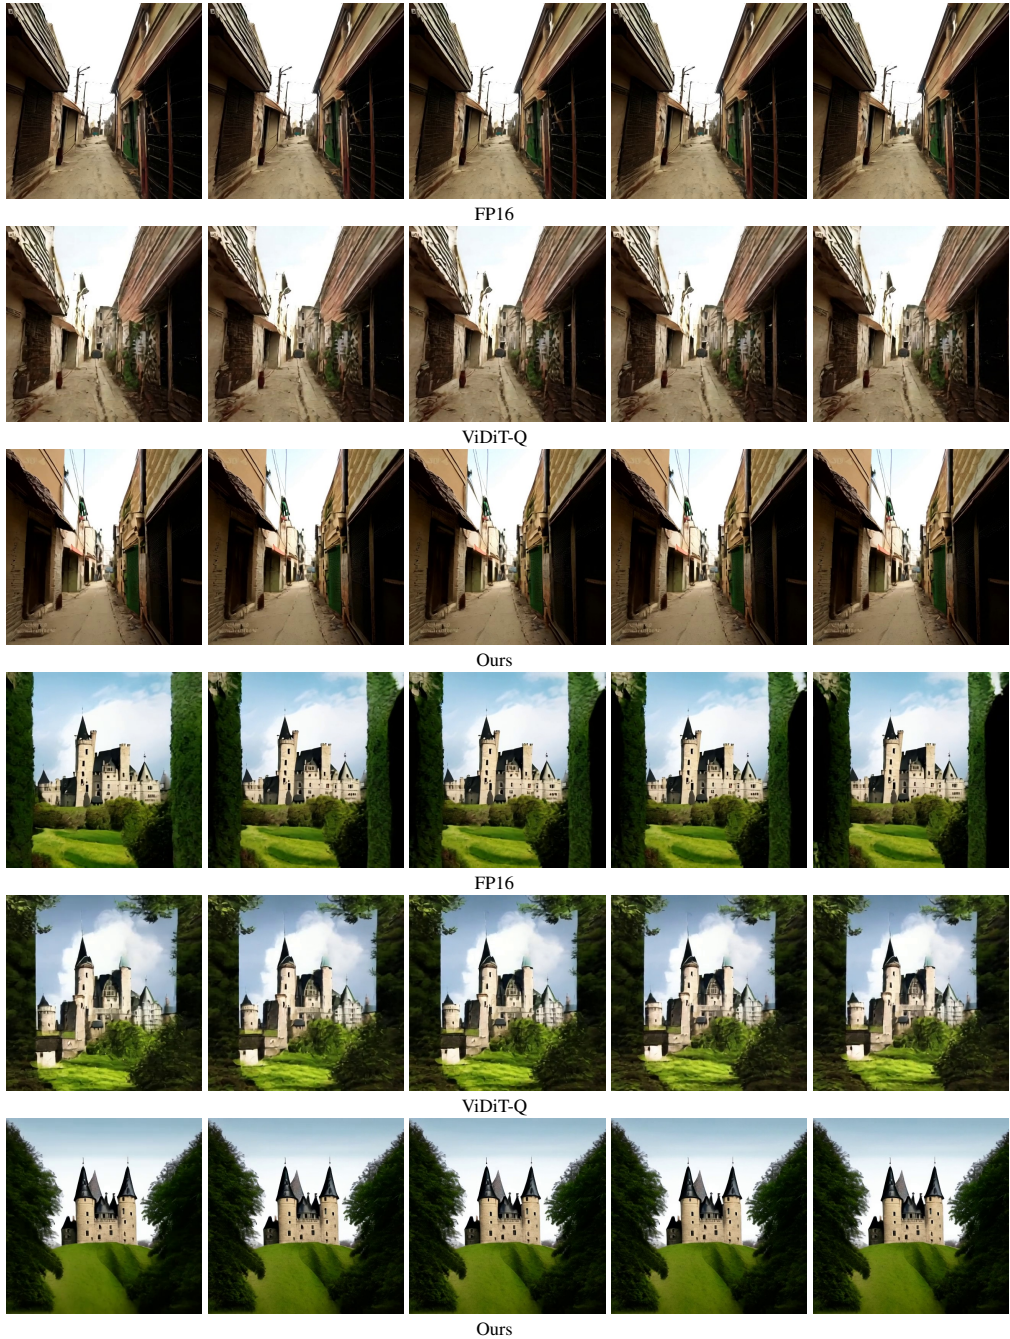

Figure 4: Visual comparison for video generation with W4A8.

378  
379  
380  
381  
382  
383  
384  
385  
386  
387  
388  
389  
390  
391  
392  
393  
394  
395  
396  
397  
398  
399  
400  
401  
402  
403  
404  
405  
406  
407  
408  
409  
410  
411  
412  
413  
414  
415  
416  
417  
418  
419  
420  
421  
422  
423  
424  
425  
426  
427  
428  
429  
430  
431

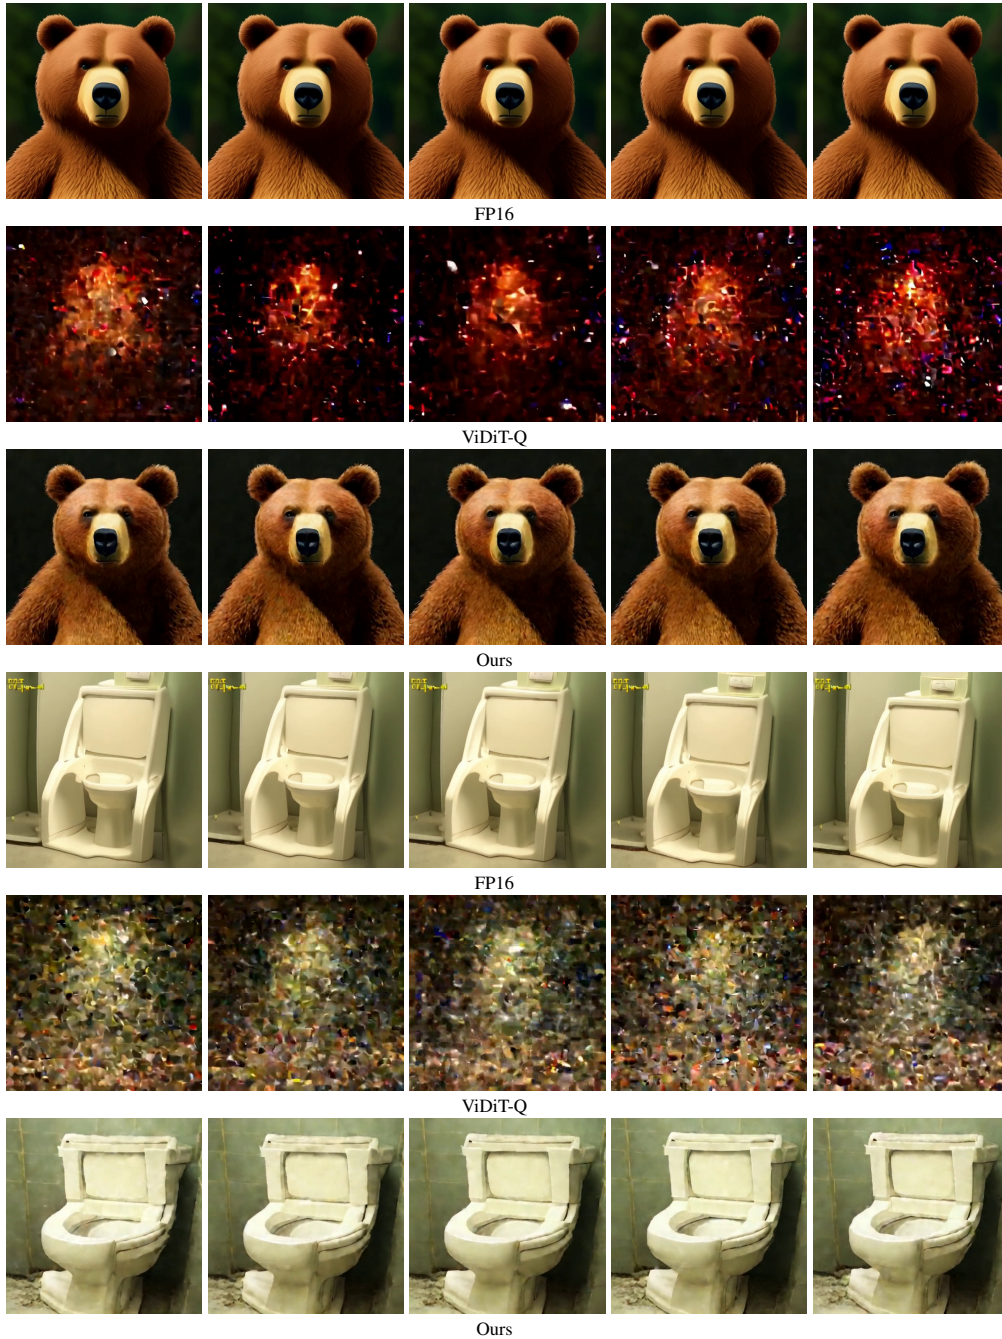

Figure 5: Visual comparison for video generation with **w4a4**.
